# Supplementary material for: High cycle stability of Zn anodes boosted by an artificial electronic–ionic mixed conductor coating layer
Source: Royal Society of Chemistry journal article supplement (doi:10.1039/d2ta00697a), 2022-01-01
Supplement: d2ta00697a1.pdf [file d2ta00697a1.pdf]

# High Cycle Stability of Zn Anode Boosted by An Artificial Electronic-Ionic Mixed Conductor Coating Layer

Weijia Fan<sup>a</sup>, Zhenwen Sun<sup>a</sup>, Ye Yuan<sup>a</sup>, Xinhai Yuan<sup>a</sup>, Chaolin You<sup>a</sup>, Qinghong Huang<sup>a</sup>, Jilei Ye<sup>a</sup>, Lijun Fu<sup>\*a</sup>, Veniamin Kondratiev<sup>b</sup>, Yuping Wu<sup>\*a</sup>

<sup>a</sup> State Key Laboratory of Materials-Oriented Chemical Engineering, College of Energy Science and Engineering, and College of Chemical Engineering, Nanjing Tech University, Nanjing 211816, Jiangsu Province, China

<sup>b</sup> Department of Electrochemistry, Institute of Chemistry, Saint Petersburg State University, 7/9 Universitetskaya nab., St. Petersburg, 199034, Russi

## Experimental Section

### Preparation of the zinc anode

PVDF+AB@Zn: The slurry comprising Acidified carbon black (AB) (70wt%), and polyvinylidene fluoride (30wt%) in N-methyl-2-pyrrolidone was cast onto zinc foil. Then the as-prepared electrode was placed in a vacuum for 12 hours.

Alg-Zn@Zn: The sodium alginate (AR grade, Aladdin) was dissolved in deionized water at a weight ratio of 1:100 followed by stirring for 12 h. Then, the homogeneous sodium alginate solution was cast onto zinc foil, and then soaked in a solution of 2 M ZnSO<sub>4</sub> to achieve Alg-Zn@Zn.

Alg-Zn+AB@Zn: The Sodium alginate, AB is dissolved in water with the weight ratio of 3:7:300. The remaining steps are the same as Alg-Zn@Zn.

### Preparation of V<sub>2</sub>O<sub>5</sub><sup>1</sup>

1.5 g commercial V<sub>2</sub>O<sub>5</sub> powder was mixed with 50 mL 2 M NaCl solution under stirring for 72 h at room temperature. The product was vacuum filtered and washed with ultrapure water and ethanol. Finally, the product was dried in at 70 °C for 12 h.

## Characterization

The crystallographic structure was analyzed by X-ray diffractometer (XRD, D/MAX-IIA, Rigaku) with Cu-K $\alpha$  radiation ( $\lambda = 0.15406$  nm) at a scanning angle ( $2\theta$ ) range of 10° to 90°. The morphology and microstructure observation of the samples was measured by scanning electron microscopy (SEM, XL-70, Philips) and optical microscope (YM520R).

## Electrochemical measurements

symmetrical batteries were tested using a glass fiber separator with Zn and Improved anodes (PVDF+AB@Zn, Alg-Zn@Zn and Alg-Zn+AB@Zn) in a CR2032 coin battery and assembled in the air. 2 M ZnSO<sub>4</sub> aqueous solution was used as the electrolyte. The electrolyte content is 60  $\mu$ L.

After that, full cells were fabricated with Alg-Zn+AB@Zn and Activated Carbon (AC)/ V<sub>2</sub>O<sub>5</sub>. AC was mixed with Carbon Black (CB), and Polytetrafluoroethylene (PTFE) at a weight ratio of 8: 1: 1, and then the slurry dried under infrared baking lamp for 1 h. Then, the mixture was pressed onto stainless steel mesh. The mass of cathode is about 4 mg cm<sup>-2</sup>.

The V<sub>2</sub>O<sub>5</sub>, Carbon Black, and PTFE binder were grinded at a mass ration of 7:2:1. The viscous mixture dried under infrared baking lamp for 1 h. Then, the mixture was pressed onto stainless steel mesh. The mass of cathode is about 4 ~ 8 mg cm<sup>-2</sup>.

The electrochemical performance was implemented by a battery test system (LAND) at room temperature. The Cyclic voltammetry (CV) was recorded on an electrochemical workstation (CHI660E). Electrochemical Impedance Spectroscopy (EIS) was measured by an impedance/gain-phase analyzer (Solartron analytical 1260A) and an electrochemical test analyzer (Solartron analytical 1287A).

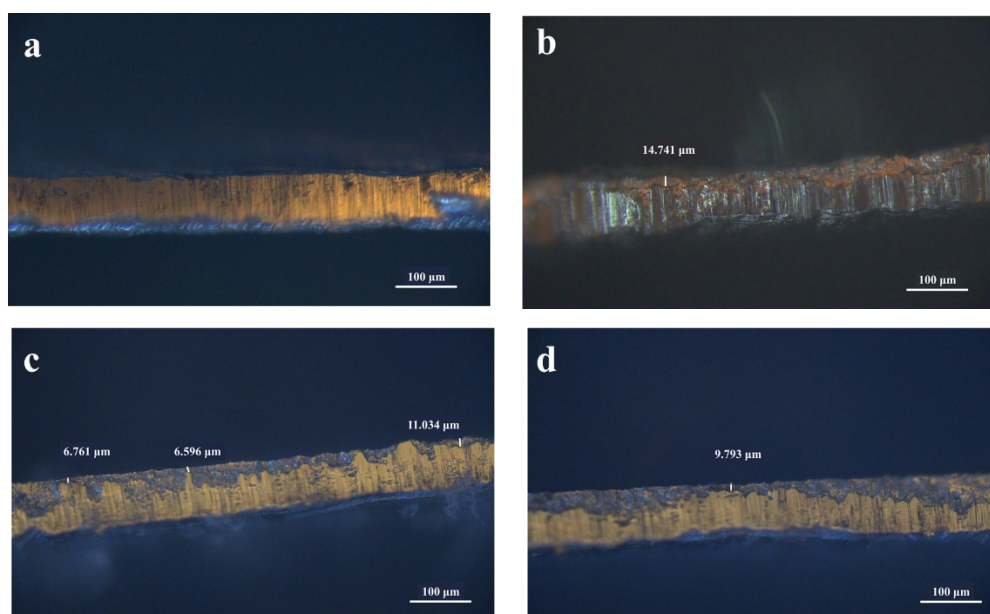

**Fig. S1** The cross-sectional optical images of a) Zn, b) PVDF+AB@Zn, c) Alg-Zn@Zn and d) Alg-Zn+AB@Zn. The coating layers were immersed in the electrolyte to observe their thickness in the status of cycling.

The varied Alg-Zn coating thickness as shown in Fig. S1c and S1d is due to the extensible property of Alg-Zn, the thinnest part of coating layer is measured as the thickness of coating layer.

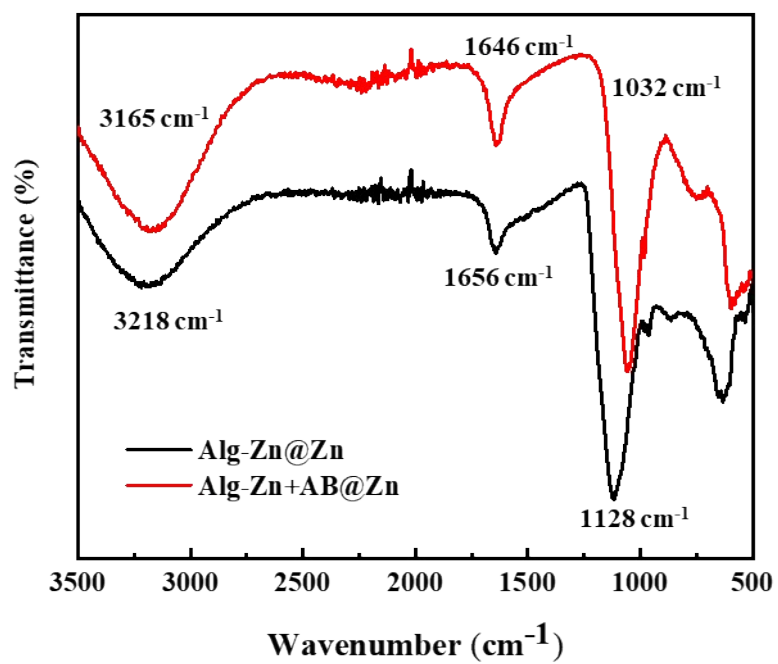

Fig. S2 FT-IR spectra of Alg-Zn@Zn and Alg-Zn+AB@Zn.

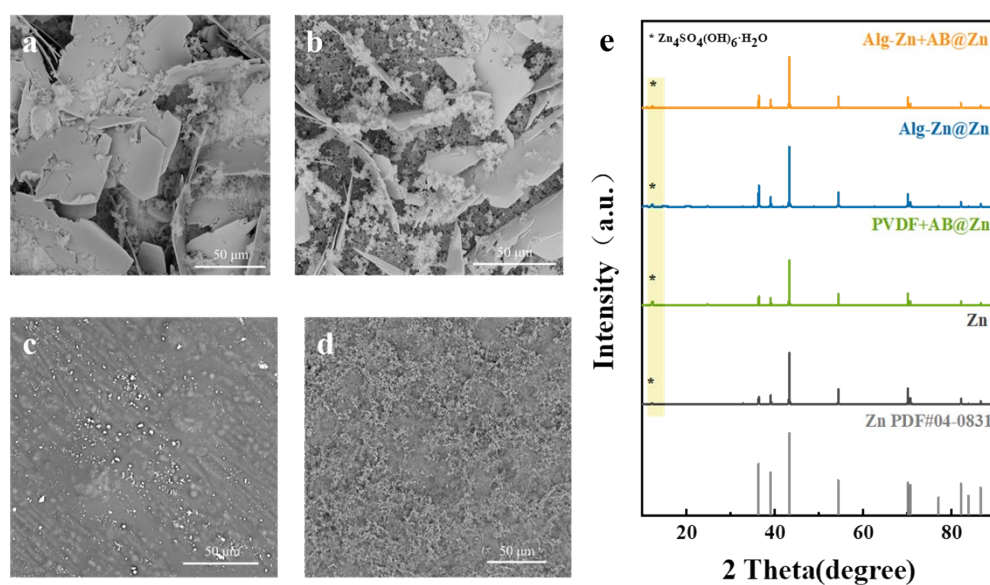

Fig. S3 Characterizations of the anode soaked in 2 M  $\text{ZnSO}_4$  electrolyte for 7 days. SEM images of a) Zn, b) PVDF+AB@Zn, c) Alg-Zn@Zn and d) Alg-Zn+AB@Zn. e) XRD patterns.

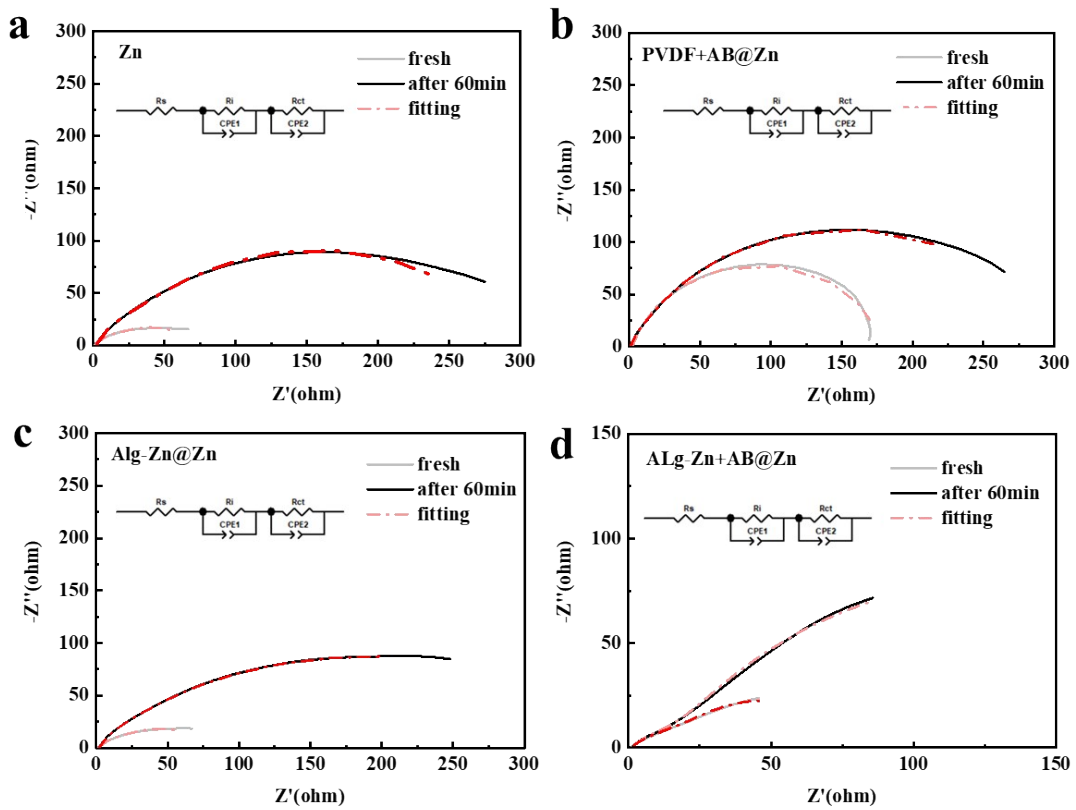

**Fig. S4** EIS of a) Zn, b) PVDF+AB@Zn, c) Alg-Zn@Zn and d) ALg-Zn+AB@Zn before and after standing. The equivalent circuit to fit the EIS data, where  $R_s$  is series resistance;  $R_i$  is solid state electrolyte interface layer resistance between electrolyte and electrode;  $R_{ct}$  is charge-transfer resistance; and CPE is constant-phase element.

**Table 1** The corresponding resistance of symmetrical cells.

|                          | $R_s$ | $R_i$ | $R_{ct}$ |
|--------------------------|-------|-------|----------|
| <b>Zn</b>                | 0.95  | 12.36 | 59.06    |
| <b>Zn-1 h</b>            | 1.87  | 15.89 | 282.8    |
| <b>PVDF+AB@Zn</b>        | 2.116 | 0.77  | 183.9    |
| <b>PVDF+AB@Zn-1 h</b>    | 1.05  | 7.05  | 288      |
| <b>Alg-Zn@Zn</b>         | 1.12  | 9.38  | 70.04    |
| <b>Alg-Zn@Zn-1 h</b>     | 1.99  | 26.96 | 273      |
| <b>Alg-Zn+AB@Zn</b>      | 1.23  | 16.75 | 47.14    |
| <b>Alg-Zn+AB@Zn- 1 h</b> | 1.384 | 32.98 | 231.2    |

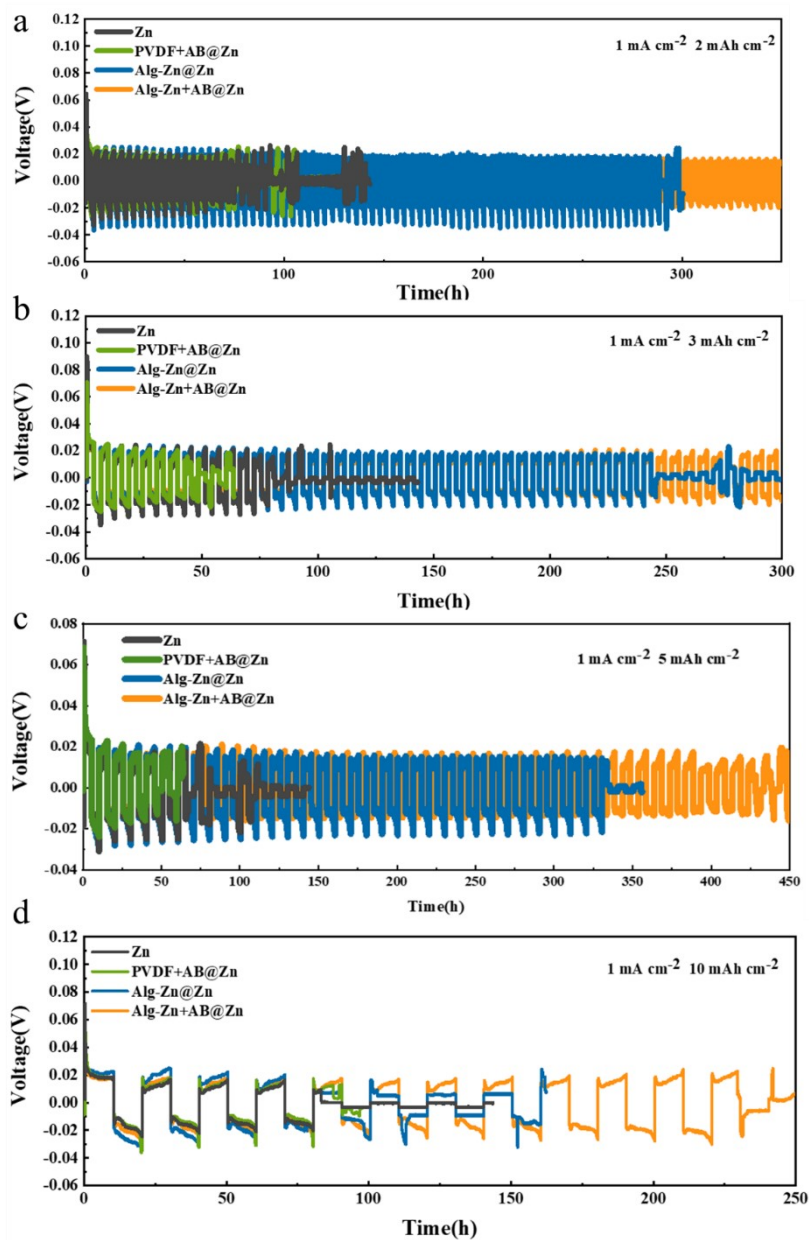

**Fig. S5** Deep stripping/plating abilities of Zn, PVDF+AB@Zn, Alg-Zn@Zn and Alg-Zn+AB@Zn with areal capacities varying from 2 to 10  $\text{mA h cm}^{-2}$  at a constant current density of  $1 \text{ mA cm}^{-2}$ .

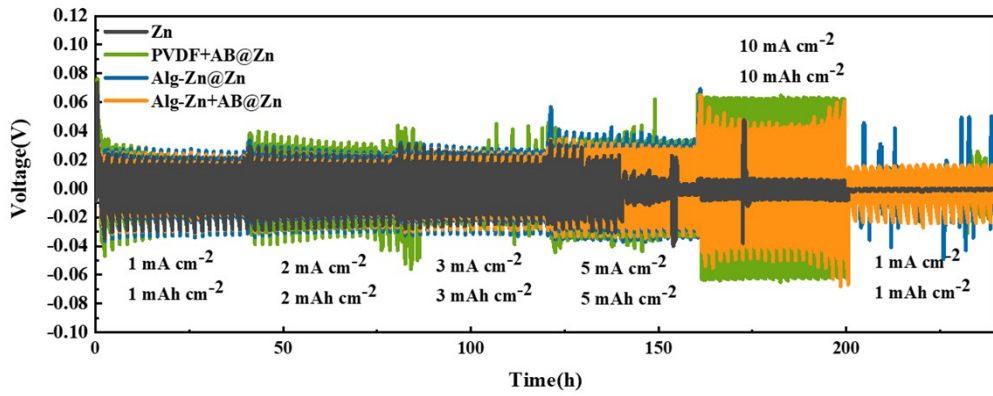

**Fig. S6** Rate performances at current densities from 1 to 10 mA cm<sup>-2</sup>.

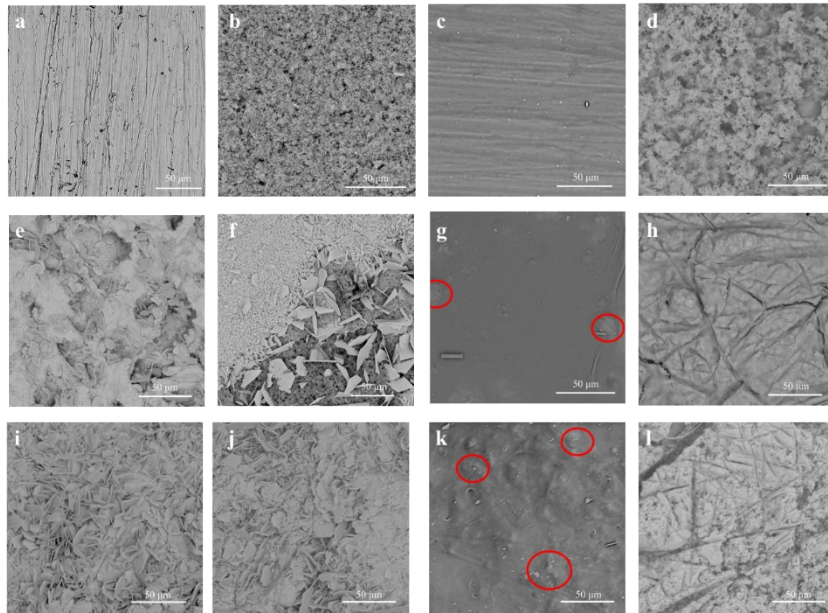

**Fig. S7** Morphology and structure of different Zn anodes after cycled in symmetrical cells at a current density of 1 mA cm<sup>-2</sup> and areal capacity of 1 mAh cm<sup>-2</sup>. a) SEM images of bare Zn before cycling, e) after 20 cycles and i) short circuit. b) SEM image of PVDF+AB@Zn before cycling, f) after 20 cycles and j) after 50 cycles. c) SEM image of Alg-Zn@Zn before cycling, g) after 20 cycles and k) after 50 cycles. d) SEM image of Alg-Zn+AB@Zn before cycling, h) after 20 cycles and l) after 50 cycles. The scale bar in Fig. S6a-6l represents 50 μm.

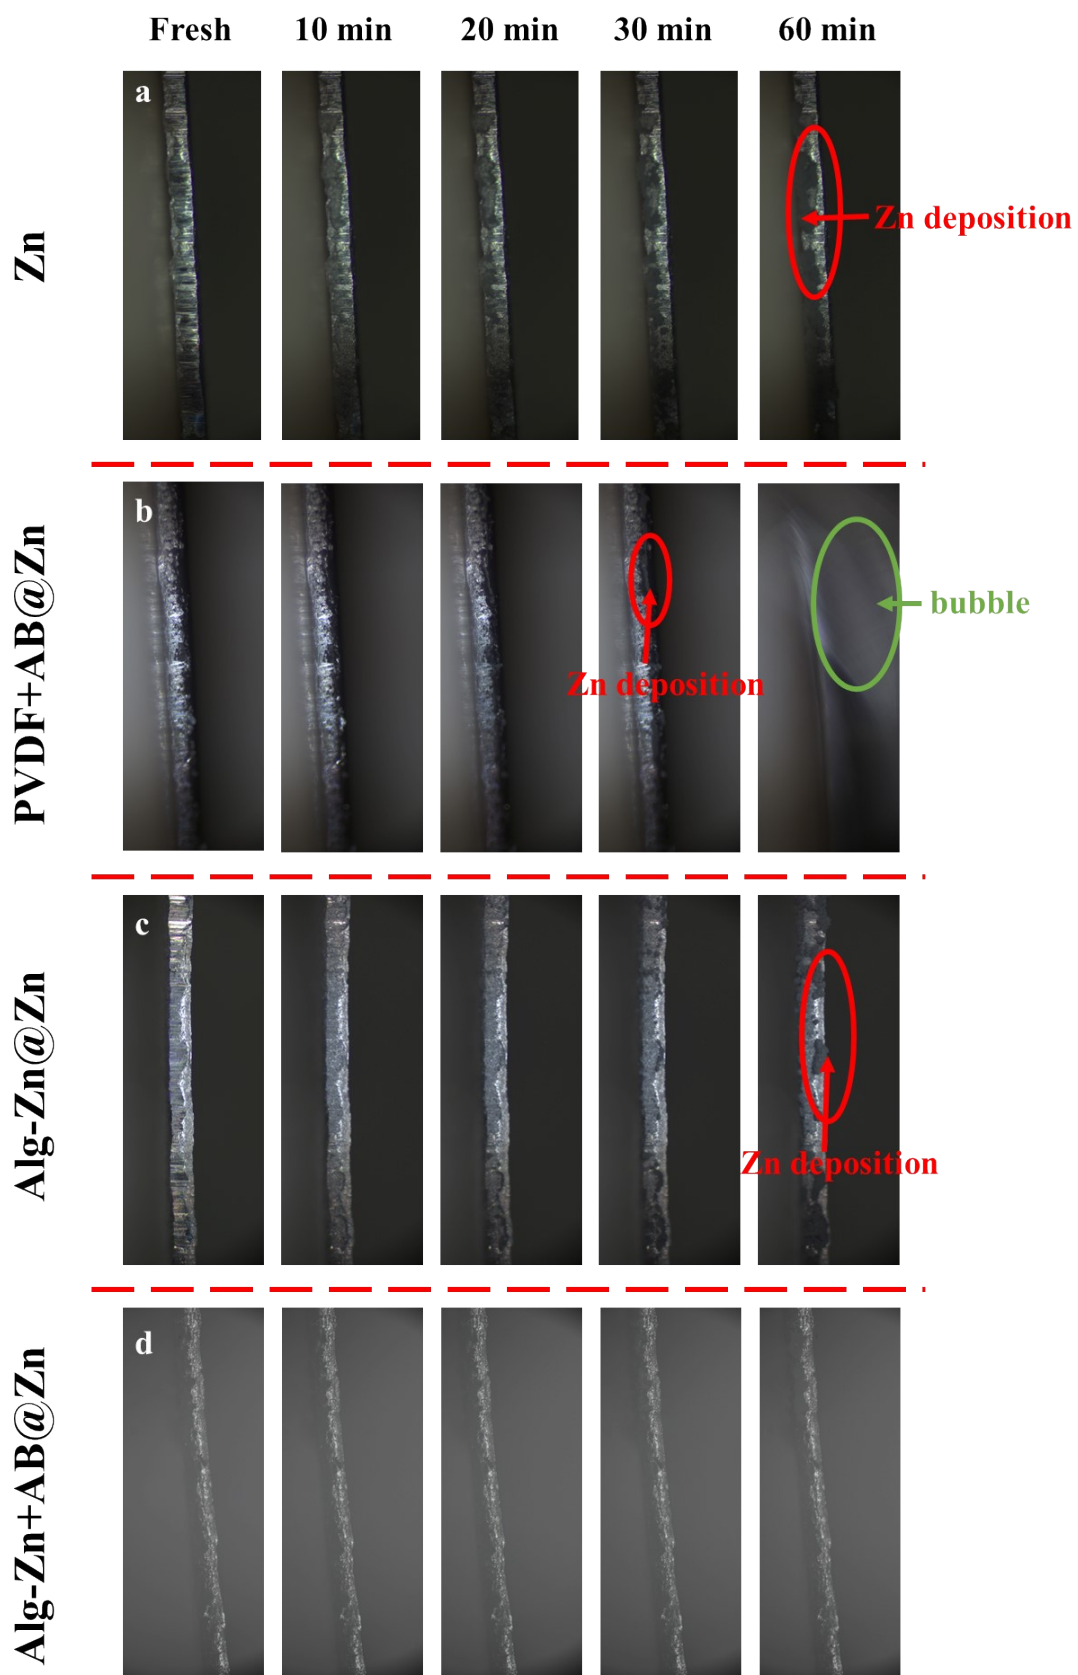

Fig. S8 In situ optical observation results of the Zn deposition morphologies on a) Zn, b) PVDF+AB@Zn, c) Alg-Zn@Zn, and d) Alg-Zn+AB@Zn at  $0.1 \text{ mA cm}^{-1}$ .

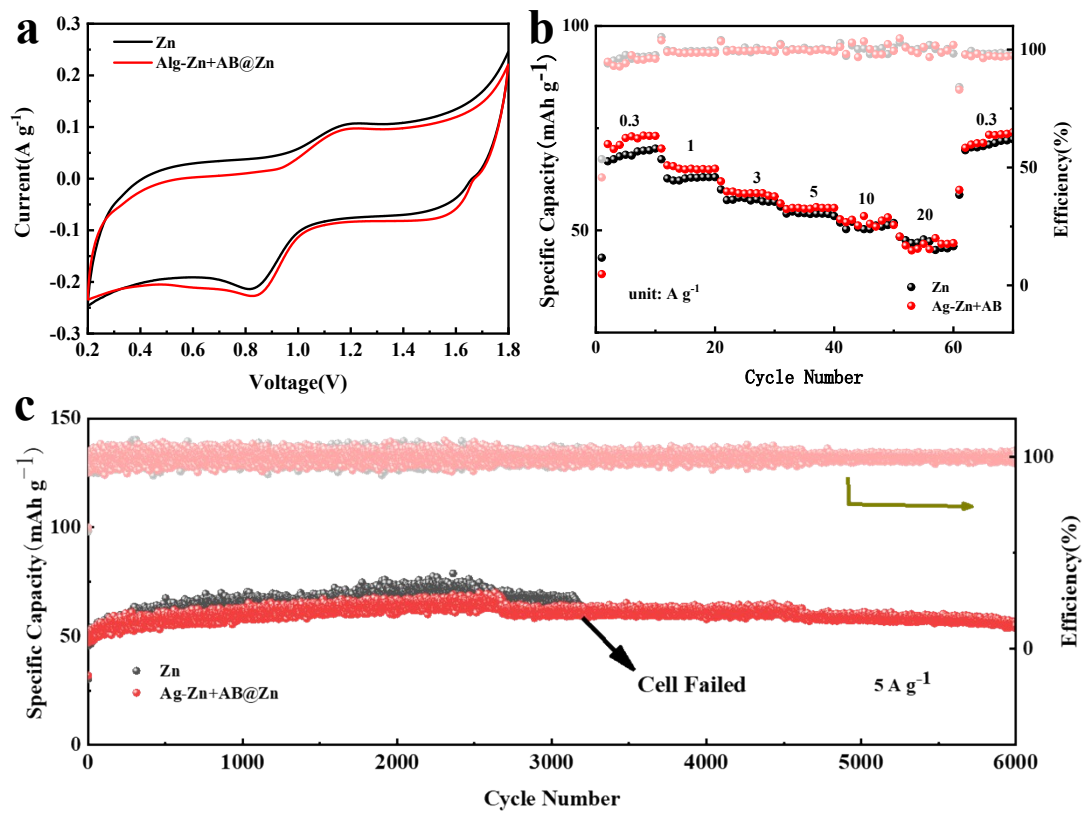

**Fig. S9** Evaluation of Zn/AC full cells with bare Zn and Alg-Zn+AB@Zn as anodes. **a)** CV curves of bare Zn/AC and Alg-Zn+AB@Zn/AC full cells at  $10\ mV\ s^{-1}$ , the current density is calculated based on the mass of AC. **b)** rate capability of bare Zn/AC and Alg-Zn+AB@Zn/AC full cells ranging from 0.3 to 20  $A\ g^{-1}$ , **c)** Cycling stability of bare Zn/AC and Alg-Zn+AB@Zn/AC full cells at  $5\ A\ g^{-1}$ .



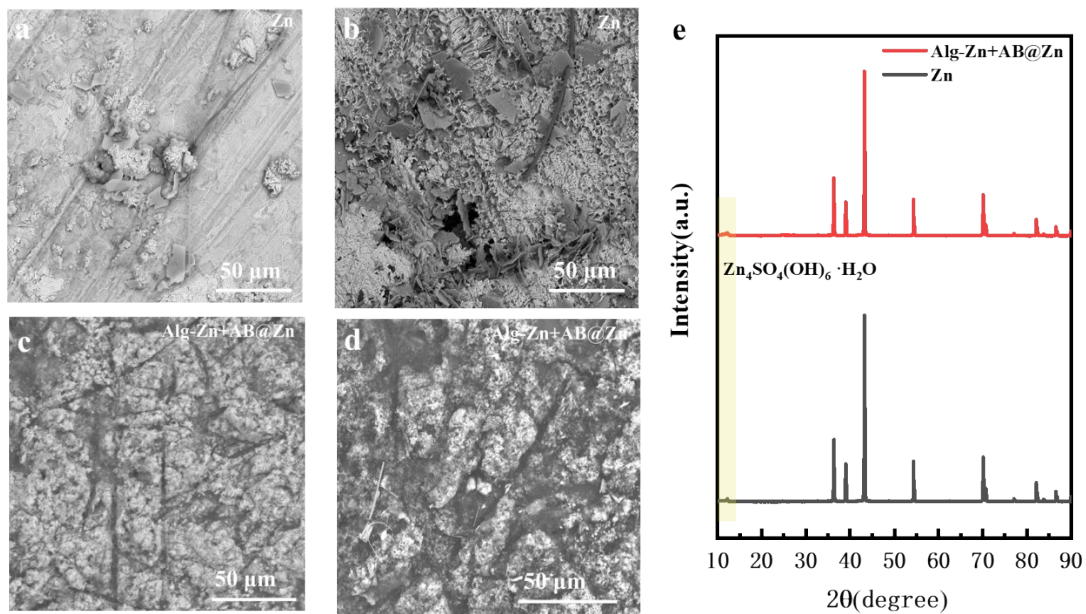

**Fig. S10** Characterizations of the anode. SEM images recovered from Zn/AC full cells of a) Zn, c) Alg-Zn+AB@Zn after 200 plating/stripping cycles at 5 A g<sup>-1</sup>; b) Zn and d) Alg-Zn+AB@Zn after 1000 plating/stripping cycles at 10 A g<sup>-1</sup>. e) XRD patterns of Zn/Zn symmetrical cells after 1000 plating/stripping cycles at 10 A g<sup>-1</sup>.

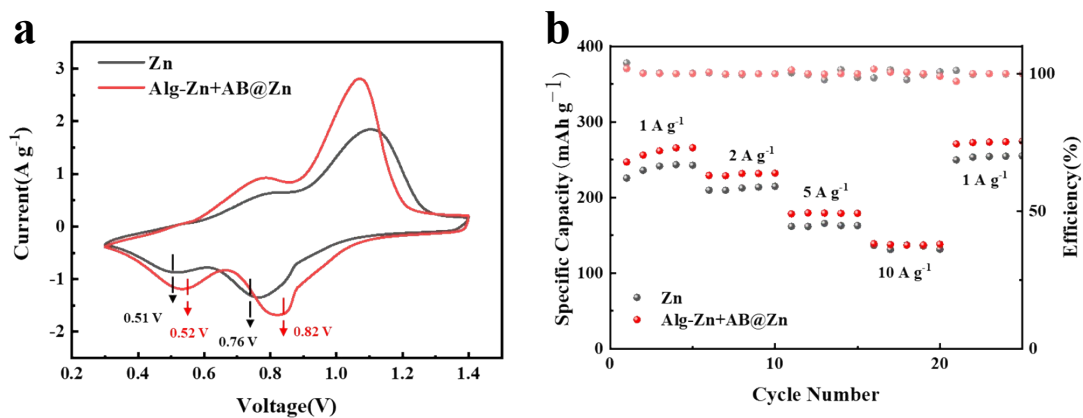

**Fig. S11** Evaluation of Zn/V<sub>2</sub>O<sub>5</sub> full cells with bare Zn and Alg-Zn+AB@Zn as anodes. a) CV images of bare Zn/V<sub>2</sub>O<sub>5</sub> and Alg-Zn+AB@Zn/V<sub>2</sub>O<sub>5</sub> full cells at 1 mV s<sup>-1</sup>, the current density is calculated based on the mass of V<sub>2</sub>O<sub>5</sub>; b) rate capability of bare Zn/V<sub>2</sub>O<sub>5</sub> and Alg-Zn+AB@Zn/V<sub>2</sub>O<sub>5</sub> full batteries ranging from 1 to 10 A g<sup>-1</sup>.

**Table. S2** Performance comparison of galvanostatic Zn stripping/plating of the reported Zn/Zn symmetrical cells.

| Strategies                            | Current density (mA cm <sup>-2</sup> ) | Areal capacity Operation (mAh cm <sup>-2</sup> ) | Over potential (mV) | Operation cycles (h) | Reference |
|---------------------------------------|----------------------------------------|--------------------------------------------------|---------------------|----------------------|-----------|
| Zn@C                                  | 2.5                                    | 1                                                | 25                  | 300                  | 2         |
| Zn/rGO                                | 10                                     | 2                                                | 400                 | 200                  | 3         |
| CM@CuO@Zn                             | 1                                      | 1                                                | 11                  | 340                  | 4         |
| PEDOT:PSS/GS@Zn                       | 1                                      | 1                                                |                     | 500                  | 5         |
| Zn In                                 | 1                                      | 1                                                | 54                  | 500                  | 6         |
| 60alucone@Zn                          | 1                                      | 1                                                | 46.1                | 498                  | 7         |
| Zn-G                                  | 0.1                                    | 0.1                                              |                     | 200                  | 8         |
| Zn/CNT                                | 2                                      | 2                                                | 27                  | 100                  | 9         |
| ZF@CB-NFC                             | 0.5                                    | 0.5                                              | 160                 | 400                  | 10        |
| PA6/Zn(TfO) <sub>2</sub> @Zn          | 0.5                                    | 1                                                |                     | 450                  | 11        |
| Zn (002)                              | 1                                      | 1                                                | 38                  | 500                  | 12        |
| Janus Separator (MOF/rGO Interlayers) | 2                                      | 1                                                | 89                  | 500                  | 13        |
| Alg-Zn+AB@Zn                          | 1                                      | 1                                                | 46                  | 500                  | This work |

**Table. S3** Performance comparison of the reported Zn/AC cells.

| Strategies                          | Current density (A g <sup>-1</sup> ) | Operation cycles | Capacity retention | Reference |
|-------------------------------------|--------------------------------------|------------------|--------------------|-----------|
| Zn@ZnF <sub>2</sub>                 | 2                                    | 5000             | 92.8%              | 14        |
| poly(4,4'-TDP)                      | 8                                    | 2000             | 71%                | 15        |
| Janus Separator (vertical graphene) | 5                                    | 5000             | 93.7%              | 16        |
| Alg-Zn+AB@Zn                        | 10                                   | 10000            | ~100%              | This work |
|                                     | 20                                   | 16000            | ~100%              |           |

## References:

1. Y. Li, Z. Huang, P. K. Kalambate, Y. Zhong, Z. Huang, M. Xie, Y. Shen and Y. Huang, *Nano Energy*, 2019, **60**, 752-759.
2. W. Li, K. Wang, M. Zhou, H. Zhan, S. Cheng and K. Jiang, *ACS Appl. Mater. Interfaces*, 2018, **10**, 22059-22066.
3. C. Shen, X. Li, N. Li, K. Xie, J. G. Wang, X. Liu and B. Wei, *ACS Appl Mater Interfaces*, 2018, **10**, 25446-25453.
4. Q. Zhang, J. Luan, X. Huang, L. Zhu, Y. Tang, X. Ji and H. Wang, *Small*, 2020, **16**, 2000929.
5. M. Qiu, D. Wang, B. Tawiah, H. Jia, B. Fei and S. Fu, *Composites Part B: Engineering*, 2021, **215**, 108798.
6. D. Han, S. Wu, S. Zhang, Y. Deng, C. Cui, L. Zhang, Y. Long, H. Li, Y. Tao, Z. Weng, Q.-H. Yang and F. Kang, *Small*, 2020, 2001736.
7. H. He and J. Liu, *J. Mater. Chem. A*, 2020, **8**, 22100-22110.
8. Z. Li, L. Wu, S. Dong, T. Xu, S. Li, Y. An, J. Jiang and X. Zhang, *Adv. Funct. Mater.*, 2020, **31**, 2006495.
9. Y. Zeng, X. Zhang, R. Qin, X. Liu, P. Fang, D. Zheng, Y. Tong and X. Lu, *Adv. Mater. Processes*, 2019, **31**, 1903675.
10. A. Wang, W. Zhou, A. Huang, M. Chen, J. Chen, Q. Tian and J. Xu, *J. Colloid Interface Sci.*, 2020, **577**, 256-264.
11. J. Cui, Z. Li, A. Xu, J. Li and M. Shao, *Small*, 2021, **17**, 2100722.
12. M. Zhou, S. Guo, J. Li, X. Luo, Z. Liu, T. Zhang, X. Cao, M. Long, B. Lu, A. Pan, G. Fang, J. Zhou and S. Liang, *Adv. Mater.*, 2021, **33**, e2100187.
13. Z. Wang, L. Dong, W. Huang, H. Jia, Q. Zhao, Y. Wang, B. Fei and F. Pan, *Nanomicro Lett*, 2021, **13**, 73.
14. Yang Yang, Liu Chaoyue, Lv Zeheng, Yang Hao, Zhang Yufei, Ye Minghui, Chen Libao, Zhao Jinbao and L. ChengChao, *Adv. Mater.*, 2021, **33**, 2007388.
15. T. Xin, Y. Wang, N. Wang, Y. Zhao, H. Li, Z. Zhang and J. Liu, *J. Mater. Chem. A*, 2019, **7**, 23076-23083.
16. C. Li, Z. Sun, T. Yang, L. Yu, N. Wei, Z. Tian, J. Cai, J. Lv, Y. Shao, M. H. Rummeli, J. Sun and Z. Liu, *Adv. Mater.*, 2020, **32**, 2003425.
